# Supplementary material for: Cross-Species Rhesus Cytomegalovirus Infection of Cynomolgus Macaques
Source: PubMed Central journal article supplement (PMC5102353; doi:10.1371/journal.ppat.1006014), 2016-11-09
Supplement: ppat.1006014.s001.pdf [file ppat.1006014.s001.pdf]

Supplemental table 1.

| Isolate       | ORFs truncated                                                                                                            | ORFs elongated                                  | ORFs deleted                                                                                                                                                                                                                                                  | Total ORFs affected |
|---------------|---------------------------------------------------------------------------------------------------------------------------|-------------------------------------------------|---------------------------------------------------------------------------------------------------------------------------------------------------------------------------------------------------------------------------------------------------------------|---------------------|
| RhCMV 68-1    | Rh08 (RL11D),<br>Rh61/Rh60<br>(UL36),<br>Rh152/Rh151<br>(UL119/UL118),<br>Rh161<br>(UL146G),<br>Rh197 (US14D)             | Rh13.1 (RL11G,<br>RL13)                         | Rh157.5<br>(UL128),<br>Rh157.4<br>(UL130),<br>Rh158.2<br>(UL146B),<br>Rh158.3<br>(UL146C),<br>Rh161.1<br>(UL146E)                                                                                                                                             | 11                  |
| RhCMV 68-1.2  | Rh08 (RL11D),<br>Rh152/Rh151<br>(UL119/UL118),<br>Rh157.4<br>(UL130), Rh161<br>(UL146G),<br>Rh167 (O14),<br>Rh197 (US14D) | Rh13.1 (RL11G,<br>RL13)                         | Rh158.2<br>(UL146B),<br>Rh158.3<br>(UL146C),<br>Rh161.1<br>(UL146E)                                                                                                                                                                                           | 10                  |
| RhCMV 68-1 FL | Rh08 (RL11D)                                                                                                              | -                                               | -                                                                                                                                                                                                                                                             | 1                   |
| RhCMV 180.92  | Rh10 (COX-2),<br>Rh13.1 (RL11G,<br>RL13), Rh21<br>(RL11K), Rh148<br>(UL116),<br>Rh157.4<br>(UL130), Rh220<br>(US28F)      | Rh06 (RL11B),<br>Rh08.1 (RL11E),<br>Rh167 (O14) | Rh159 (UL148),<br>Rh158 (UL147),<br>Rh158.1<br>(UL146A),<br>Rh158.2<br>(UL146B),<br>Rh158.3<br>(UL146C),<br>Rh161.1<br>(UL146E),<br>Rh161<br>(UL141G),<br>Rh162 (UL145),<br>Rh163 (UL144),<br>Rh164 (UL141),<br>Rh164.1 (O11),<br>Rh165 (O12),<br>Rh166 (O13) | 22                  |
| RhCMV 19262   | Rh08.1 (RL11E),<br>Rh23 (RL11M),<br>Rh158 (UL147),<br>Rh158.1<br>(UL146A),<br>Rh158.3<br>(UL146C),<br>Rh161 (UL146G)      | Rh13.1 (RL11G,<br>RL13)                         | -                                                                                                                                                                                                                                                             | 7                   |

|                    |                                                             |                                 |                                                                                                                                 |   |
|--------------------|-------------------------------------------------------------|---------------------------------|---------------------------------------------------------------------------------------------------------------------------------|---|
| RhCMV 19936        | Rh07 (RL11C)                                                | Rh06 (RL11B),<br>Rh08.1 (RL11E) | -                                                                                                                               | 3 |
| RhCMV 24514        | Rh08 (RL11D),<br>Rh13.1 (RL11G,<br>RL13), Rh161<br>(UL146G) | -                               | -                                                                                                                               | 3 |
| CyCMV Ottawa       | Cy08 (RL11D),<br>Cy112 (UL83B)                              | Cy06 (RL11B)                    | Cy08.1 (RL11E),<br>Cy10 (COX-2),<br>Cy12 (RL11F),<br>Cy13.1 (RL11G,<br>RL13), Cy22<br>(RL11L), Cy179<br>(O23)                   | 9 |
| CyCMV<br>Mauritius | Cy08 (RL11D)                                                | Cy07 (RL11C)                    | Cy08.1 (RL11E),<br>Cy10 (COX-2),<br>Cy12 (RL11F),<br>Cy13.1 (RL11G,<br>RL13), Cy17<br>(RL11H), Cy19<br>(RL11I), Cy22<br>(RL11L) | 9 |
| CyCMV 31906        | Cy08 (RL11D),<br>Cy13.1 (RL11G,<br>RL13)                    | Cy07 (RL11C)                    | Cy08.1 (RL11E),<br>Cy22 (RL11L)                                                                                                 | 5 |
| CyCMV 31907        | Cy08 (RL11D),<br>Cy20 (RL11J)                               | Cy07 (RL11C)                    | Cy08.1 (RL11E),<br>Cy22 (RL11L)                                                                                                 | 5 |
| CyCMV 31908        | Cy08 (RL11D),<br>Cy13.1 (RL11G,<br>RL13)                    | Cy06 (RL11B),<br>Cy07 (RL11C)   | Cy08.1 (RL11E),<br>Cy22 (RL11L)                                                                                                 | 6 |
| CyCMV 31909        | Cy08 (RL11D),<br>Cy13.1 (RL11G,<br>RL13)                    | Cy06 (RL11B),<br>Cy07 (RL11C)   | Cy08.1 (RL11E),<br>Cy22 (RL11L)                                                                                                 | 6 |
